# Supplementary material for: Next-generation sequencing of HIV-1 single genome amplicons
Source: PubMed Central journal article supplement — Biomol Detect Quantif. 2019 Mar 11;17:100080. doi: 10.1016/j.bdq.2019.01.002 (PMC6423504; doi:10.1016/j.bdq.2019.01.002), 2019-03-11

| 2500 | 2501 | 2502 | 2503 | 2504 | 2505 | 2506 | 2507 | 2508 | 2509 | 2510 | 2511 | 2512 | 2513 | 2514 | 2515 | 2516 | 2517 | 2518 | 2519 | 2520 | 2521 | 2522 | 2523 | 2524 | 2525 | 2526 |
|------|------|------|------|------|------|------|------|------|------|------|------|------|------|------|------|------|------|------|------|------|------|------|------|------|------|------|
| T    | C    | A    | G    | G    | A    | A    | C    | T    | A    | A    | A    | G    | A    | A    | G    | A    | G    | T    | G    | C    | T    | G    | T    | T    | A    | G    |
| T    | C    | A    | G    | G    | A    | A    | C    | T    | A    | A    | A    | G    | A    | A    | G    | A    | G    | T    | G    | C    | T    | G    | T    | T    | A    | G    |
| T    | C    | A    | G    | G    | A    | A    | C    | T    | A    | A    | A    | G    | A    | A    | G    | A    | G    | T    | G    | C    | T    | G    | T    | T    | A    | G    |
| T    | C    | A    | G    | G    | A    | A    | C    | T    | A    | A    | A    | G    | A    | A    | G    | A    | G    | T    | G    | C    | T    | G    | T    | T    | A    | G    |
| T    | C    | A    | G    | G    | A    | A    | C    | T    | A    | A    | A    | G    | A    | A    | G    | A    | G    | T    | G    | C    | T    | G    | T    | T    | A    | G    |
| T    | C    | A    | G    | G    | A    | A    | C    | T    | A    | A    | A    | G    | A    | A    | G    | A    | G    | T    | G    | C    | T    | G    | T    | T    | A    | G    |
| T    | C    | A    | G    | G    | A    | A    | C    | T    | A    | A    | A    | G    | A    | A    | G    | A    | G    | T    | G    | C    | T    | G    | T    | T    | A    | G    |
| T    | C    | A    | G    | G    | A    | A    | C    | T    | A    | A    | A    | G    | A    | A    | G    | A    | G    | T    | G    | C    | T    | G    | T    | T    | A    | G    |
| T    | C    | A    | G    | G    | A    | A    | C    | T    | A    | A    | A    | G    | A    | A    | G    | A    | G    | T    | G    | C    | T    | G    | T    | T    | A    | G    |
| S    | e    | r    | G    | l    | y    | T    | h    | r    | L    | y    | s    | G    | l    | u    | G    | l    | u    | C    | y    | s    | C    | y    | s    | *    | *    | *    |
| e    | G    | l    | n    | G    | l    | u    | L    | e    | u    | L    | y    | s    | L    | y    | s    | S    | e    | r    | A    | l    | a    | V    | a    | l    | S    | e    |
| h    | e    | A    | r    | g    | A    | s    | n    | *    | *    | *    | A    | r    | g    | A    | r    | g    | V    | a    | l    | L    | e    | u    | L    | e    | u    | V    |

Notes:

Position 2516: base call "A" because there is bidirectional support for A@77% and G@23%.

|       | A     | C  | G    | T | -  | A%    | C%   | G%    | T%   | -%   | Coverage | Coverage % |
|-------|-------|----|------|---|----|-------|------|-------|------|------|----------|------------|
| FWD   | 18345 | 5  | 5633 | 4 | 5  | 76.46 | 0.02 | 23.48 | 0.02 | 0.02 | 23992    | 56.52      |
| REV   | 14340 | 5  | 4104 | 0 | 7  | 77.70 | 0.03 | 22.24 | 0.00 | 0.04 | 18456    | 43.48      |
| TOTAL | 32685 | 10 | 9737 | 4 | 12 | 77.00 | 0.02 | 22.94 | 0.01 | 0.03 | 42448    | 100.00     |

Residue Frequency: position 2516

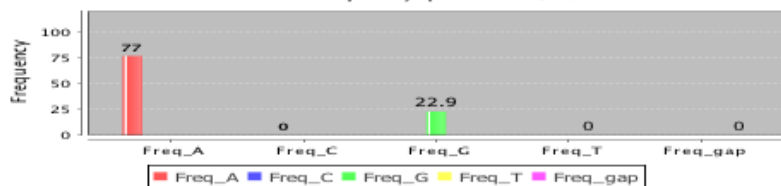

Residue Count: position 2516

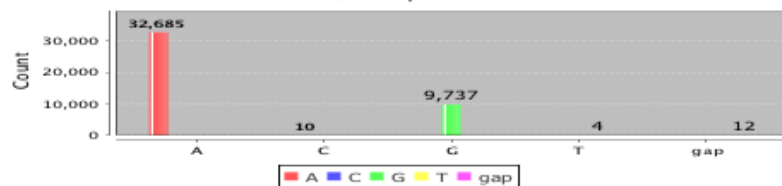

Supplement: mmc1.pdf [file mmc1.pdf]
