# Supplementary material for: Next-generation sequencing of HIV-1 single genome amplicons
Source: PubMed Central journal article supplement — Biomol Detect Quantif. 2019 Mar 11;17:100080. doi: 10.1016/j.bdq.2019.01.002 (PMC6423504; doi:10.1016/j.bdq.2019.01.002), 2019-03-11
Supplement: mmc2.pdf [file mmc2.pdf]

# Subtype B

CRF02\_AG  
Subtype A  
CRF01\_AE  
Subtype G  
Subtype J  
Subtype C  
Subtype H  
Subtype F  
Subtype K  
Subtype D

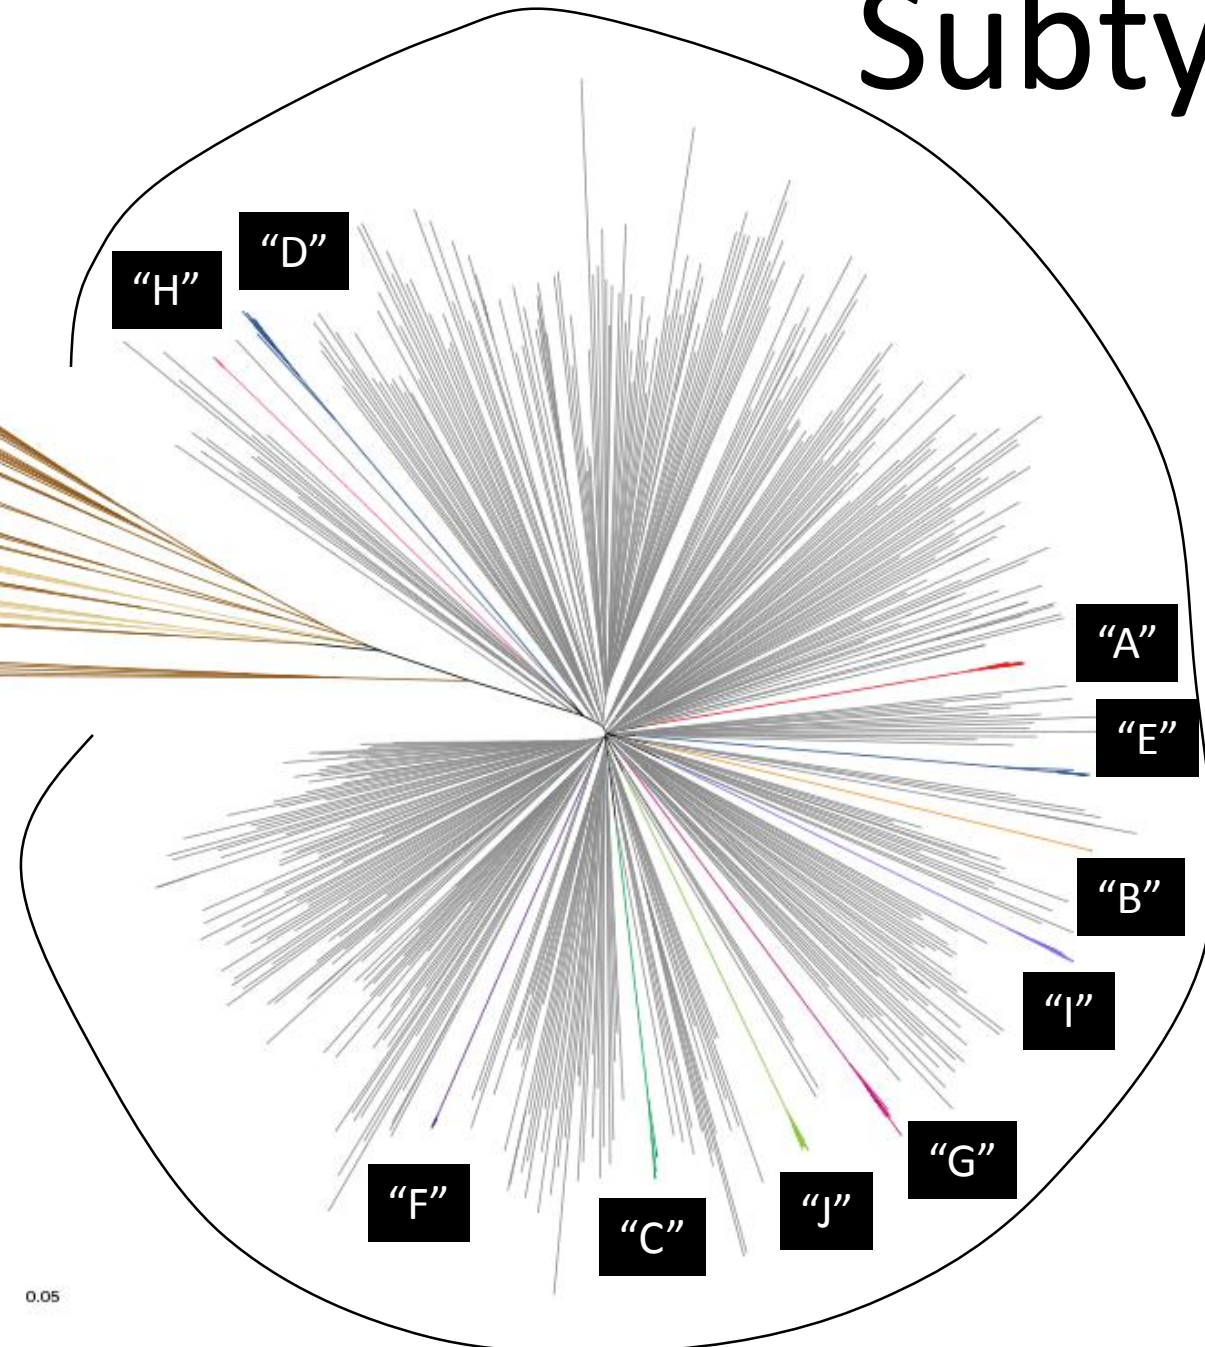

0.05
