# Supplementary material for: Next-generation sequencing of HIV-1 single genome amplicons
Source: PubMed Central journal article supplement — Biomol Detect Quantif. 2019 Mar 11;17:100080. doi: 10.1016/j.bdq.2019.01.002 (PMC6423504; doi:10.1016/j.bdq.2019.01.002), 2019-03-11

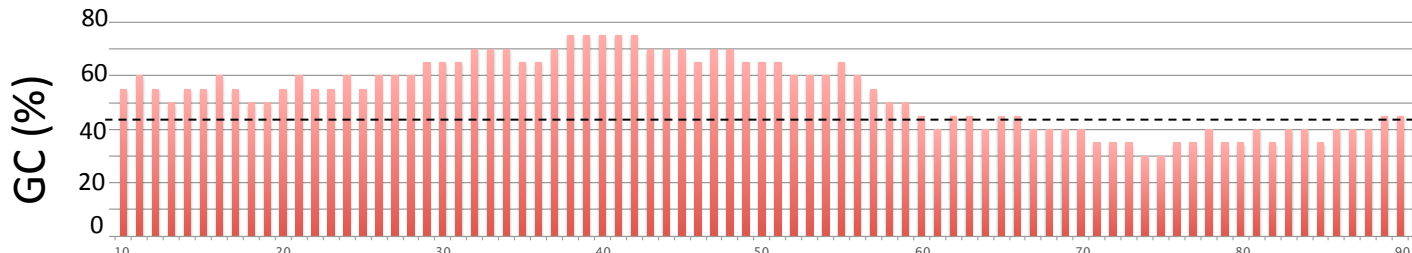

Sanger  
NGS

1 10 20 30 40 50 60 70 80 90 100

ACGAGAGCGATGGAGATGAGGAAGCCTTGGCAGCACATGGGGGACAGGGGGCATCTTGCTCCTTGGAAATGTTGATGATCTGTAAATGCTGAAGACTTGTGGG  
 T R A M E M R K P W O H W G T G G I L L L G M L M I C N A E D L W

Sanger

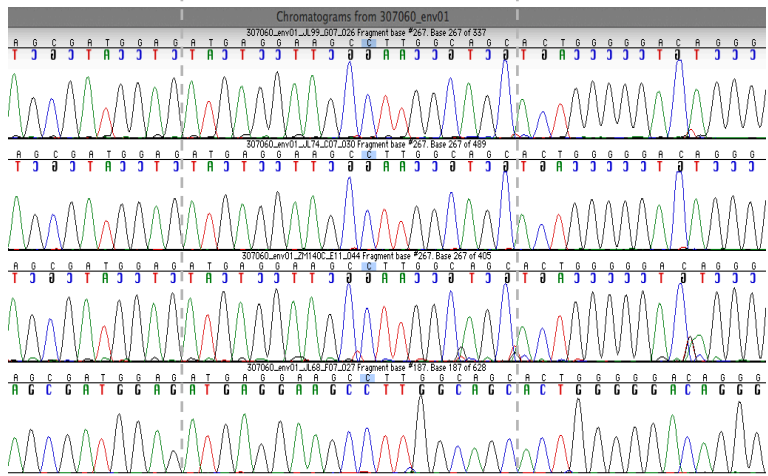

Direction of  
Sequencing Primer

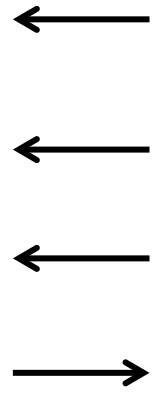

NGS

ATGAGGAAGCCTTGGCAGCAC  
 ATGAGGAAGCTTGGCAGCAC  
 ATGAGGAACTTGGCAGCAC  
 ATGAGGAACTTGGCAGCAC

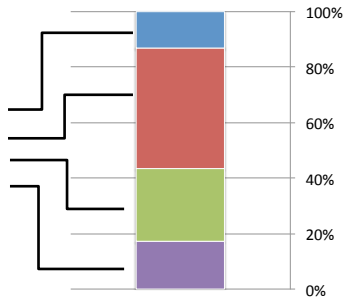

Supplement: mmc3.pdf [file mmc3.pdf]
